# Supplementary material for: Predictors for Survival of Patients with Squamous Cell Carcinoma of Unknown Primary in the Head and Neck Region
Source: MDPI journal article supplement (doi:10.3390/cancers15072167), 2023-04-06
Supplement: s1 [file s1]

# Supplementary Figure S1: Examples of patients with CUP<sub>HNSCC</sub> stratified by principal component analysis (PCA).

A

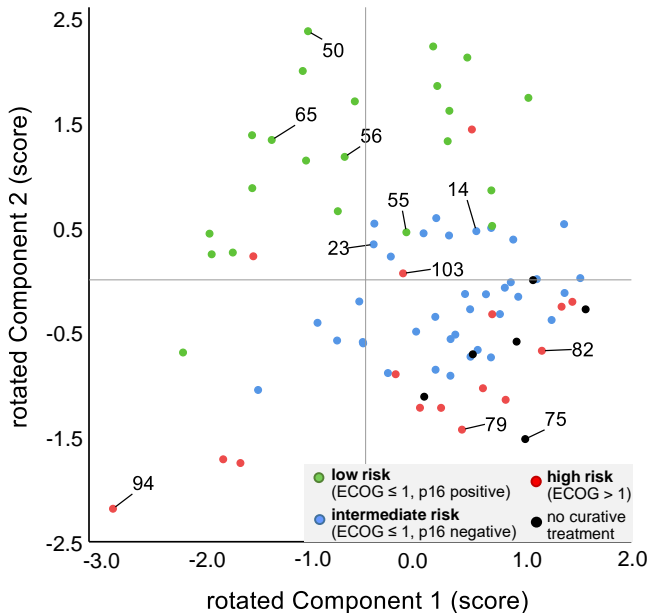

B

| RPA Risk group                | No. | ECOG | p16 / HR DNA | N stage | Gender | ENE | Smoking & Alcohol | Age  | Hist. grading | Status | OS   |
|-------------------------------|-----|------|--------------|---------|--------|-----|-------------------|------|---------------|--------|------|
| low<br>ECOG ≤1<br>p16+        | 50  | 0    | + / +        | N2a     | f      | no  | no / no           | 51.3 | high          | alive  | 5.2  |
|                               | 65  | 1    | + / +        | N1      | m      | no  | no / no           | 59.4 | high          | alive  | 12.7 |
|                               | 56  | 1    | + / +        | N2a     | m      | no  | yes / no          | 69.8 | high          | alive  | 7.8  |
|                               | 55  | 1    | + / -        | N2c     | m      | no  | yes / no          | 65.0 | high          | alive  | 6.2  |
| intermediate<br>ECOG ≤1, p16- | 23  | 0    | - / -        | N2b     | f      | no  | yes / no          | 68.9 | high          | alive  | 5.7  |
|                               | 14  | 1    | - / -        | N2b     | f      | yes | yes / no          | 35.9 | low           | dead   | 2.8  |
| high<br>ECOG >1               | 103 | 2    | + / -        | N1      | m      | no  | yes / yes         | 59.8 | high          | alive  | 5.2  |
|                               | 94  | 3    | - / -        | N1      | f      | no  | no / no           | 90.1 | low           | alive  | 1.9  |
|                               | 82  | 2    | - / -        | N3      | m      | yes | yes / yes         | 62.6 | high          | dead   | 0.7  |
|                               | 79  | 3    | - / -        | N3      | m      | no  | yes / yes         | 72.7 | high          | dead   | 0.7  |
| no curative treatment         | 75  | 4    | - / -        | N3      | m      | yes | yes / yes         | 61.8 | high          | dead   | 0.2  |

**A:** Distribution of all cases with CUP<sub>HNSCC</sub> without missing data (n =81) according to the resulting two main components (components 1 and 2) of the principal component analysis shown in Figure 3, color-coded according to the predicted risk groups (Figure 2C). Selected cases labeled. **B:** Risk factor profile heatmap of selected cases (No.: labeled in A) in comparison to risk groups predicted by recursive partitioning (RPA) and overall survival (OS).
